# Supplementary material for: Water and ammonia on Cu{110}: comparative structure and bonding
Source: Royal Society of Chemistry journal article supplement (doi:10.1039/c3cp42658k), 2013-01-01
Supplement: c3cp42658k.pdf [file c3cp42658k.pdf]

Water and Ammonia on Cu{110}:  
Comparative Structure and Bonding  
Supplementary Data

November 2, 2012

### Estimating the Zero-Point Energy Contribution to $\Delta H_{ads}^B$ Differences

We wish to estimate how much effect zero-point energy would likely have on the difference in adsorption heat between an  $H_2O/H_2O$  model for adsorption on  $Cu\{110\}$  and an  $H_2O/OH$  model, according to the definition of  $\Delta H_{ads}^B$  where excess hydrogen  $H_2$  desorbs from the surface.

The relevant reactions are:-

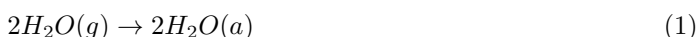

and

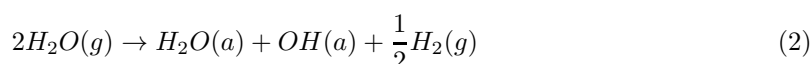

where (a) and (g) indicate adsorbed and gas-phase moieties.

First, we note that both adsorption models involve half of the gas-phase  $H_2O$  molecules adsorbing directly to the surface in very similar local geometries. Although zero-point energy will clearly contribute to the adsorption heat of these molecules, we can reasonably assume that this contribution will be more or less the same for both the  $H_2O/H_2O$  and the  $H_2O/OH$  models. The difference in the zero-point energy contribution to  $\Delta H_{ads}^B$  between the two models must therefore derive predominantly from the adsorption of the other  $H_2O$  molecules.

In the  $H_2O/H_2O$  model, these other  $H_2O$  molecules adsorb without forming a direct bond to the surface itself. Instead, they are attached to the chemisorbed  $H_2O$  molecules via hydrogen bonds, and may be said to occupy a semi-ice configuration (i.e. their environment is halfway between ice-like and gas-like environments). Recent work by Murray and Galli [*Phys. Rev. Lett.* **108**, 105502 (2012)] indicates that the change in zero-point energy in going from gas-phase to ice-like water is an increase of around 0.12–0.13 eV per molecule (depending upon the ice phase and the density functional used in the calculations). It seems not unreasonable, therefore, to suggest that the change in zero-point energy for each semi-ice  $H_2O$  molecule will be around half this value; let us say an increase of 0.065 eV per semi-ice  $H_2O$  molecule.

In the  $H_2O/OH$  model, the dissociating  $H_2O$  molecules adsorb directly to the surface as OH, and the excess hydrogen atom desorbs as half of an  $H_2$  molecule. The zero-point energies of gas-phase  $H_2O$  and  $H_2$  molecules may be obtained straightforwardly from experimental frequencies, and are 0.57 eV and 0.28 eV, respectively, while that of a gas-phase OH moiety may similarly be determined to be 0.23 eV. If the O–H stretch mode of adsorbed OH were unaltered from its gas-phase value, therefore, the change in zero-point energy upon partially dissociative adsorption of OH, with desorption of excess hydrogen, would be a drop of 0.20 eV per OH moiety. To this figure must be added a correction due to redshift of the O–H bond upon adsorption, and contributions from the frustrated rotations and translations of the adsorbed OH moiety. Even on a reactive surface like  $Pt\{111\}$ , the O–H bond redshifts by only around  $250\text{ cm}^{-1}$  upon adsorption [Clay, Haq and Hodgson, *Phys. Rev. Lett.* **92**, 046102 (2004)], which would correspond to a decrease in zero-point energy of 0.015 eV, so on a much less reactive surface like  $Cu\{110\}$  it seems reasonable to estimate a decrease of no more than around 0.005 eV. For the frustrated rotations and translations, let us estimate that they average around  $150\text{ cm}^{-1}$  (zero-point energy 0.01 eV) so with five such modes in total we might have a contribution of 0.05 eV to the zero-point energy. Putting all of these together, we estimate that the overall change in zero-point energy upon partially dissociative adsorption of OH, with desorption of excess hydrogen, would be a drop of 0.155 eV per OH moiety.

From these estimates, we can expect that zero-point energy will destabilise the  $H_2O/H_2O$  model relative to the  $H_2O/OH$  model by 0.22 eV per OH moiety. Expressing  $\Delta H_{ads}^B$  per gas-phase  $H_2O$  molecule (as in the main text) this becomes approximately  $0.1\text{ eV}\cdot\text{molecule}^{-1}$ .

### Structural Models Discussed in the Text

The following tables contain cartesian coordinates for the calculated geometries discussed in the paper. Various unit cells have been used, with lateral dimensions given below:-

$$(3 \times 2) - \mathbf{a}_1 = (0.0000, 7.6494, 0.0000); \mathbf{a}_2 = (7.2120, 0.0000, 0.0000)$$

$$(2 \times 2) - \mathbf{a}_1 = (0.0000, 5.0997, 0.0000); \mathbf{a}_2 = (7.2120, 0.0000, 0.0000)$$

$$(2 \times 1) - \mathbf{a}_1 = (0.0000, 5.0997, 0.0000); \mathbf{a}_2 = (3.6060, 0.0000, 0.0000)$$

Table 1: Structure of the most stable H<sub>2</sub>O monomer at 0.167 ML, calculated within a (3×2) cell (Data for Fig. 2).

| Element | x         | y         | z        |
|---------|-----------|-----------|----------|
| H       | -1.518631 | -4.248905 | 11.99561 |
| H       | -1.605175 | -5.795324 | 12.03906 |
| O       | -0.967562 | -5.052636 | 12.11474 |
| Cu      | 5.409000  | -1.274939 | 1.274914 |
| Cu      | 1.803000  | -1.274939 | 1.274914 |
| Cu      | 5.409000  | -3.824741 | 1.274914 |
| Cu      | 1.803000  | -3.824741 | 1.274914 |
| Cu      | 5.409000  | -6.374542 | 1.274914 |
| Cu      | 1.803000  | -6.374542 | 1.274914 |
| Cu      | 3.606000  | -5.099680 | 2.549827 |
| Cu      | 0.000000  | -5.099680 | 2.549827 |
| Cu      | 3.606000  | -2.549802 | 2.549827 |
| Cu      | 0.000000  | -2.549802 | 2.549827 |
| Cu      | 3.606000  | 0.000000  | 2.549827 |
| Cu      | 0.000000  | 0.000000  | 2.549827 |
| Cu      | 5.409000  | -3.824741 | 3.824741 |
| Cu      | 1.803000  | -3.824741 | 3.824741 |
| Cu      | 5.409000  | -6.374542 | 3.824741 |
| Cu      | 1.803000  | -6.374542 | 3.824741 |
| Cu      | 5.409000  | -1.274939 | 3.824741 |
| Cu      | 1.803000  | -1.274939 | 3.824741 |
| Cu      | 3.606000  | -5.099680 | 5.099654 |
| Cu      | 0.000000  | -5.099680 | 5.099654 |
| Cu      | 3.606000  | 0.000000  | 5.099654 |
| Cu      | 0.000000  | 0.000000  | 5.099654 |
| Cu      | 3.606000  | -2.549802 | 5.099654 |
| Cu      | 0.000000  | -2.549802 | 5.099654 |
| Cu      | 5.407557  | -1.273180 | 6.392111 |
| Cu      | 1.785763  | -1.276698 | 6.380075 |
| Cu      | 5.411885  | -3.829101 | 6.381504 |
| Cu      | 1.788288  | -3.831243 | 6.378647 |
| Cu      | 5.411596  | -6.373701 | 6.388643 |
| Cu      | 1.786196  | -6.373013 | 6.380891 |
| Cu      | 3.580974  | -0.006961 | 7.634794 |
| Cu      | -0.010457 | -0.003977 | 7.636834 |
| Cu      | 3.586023  | -2.556839 | 7.632143 |
| Cu      | -0.010674 | -2.557834 | 7.631327 |
| Cu      | 3.589845  | -5.107406 | 7.629899 |
| Cu      | -0.013270 | -5.106947 | 7.679875 |
| Cu      | 5.379503  | -1.303701 | 8.977635 |
| Cu      | 1.795211  | -1.300565 | 8.958053 |
| Cu      | 1.770690  | -3.850367 | 8.964376 |
| Cu      | 1.768022  | -6.398408 | 8.969680 |
| Cu      | 5.392484  | -3.852585 | 8.957849 |
| Cu      | 5.391186  | -6.406670 | 8.966008 |
| Cu      | 3.566045  | -0.008797 | 10.09344 |
| Cu      | -0.011395 | -0.042761 | 10.08406 |
| Cu      | 3.581623  | -2.567013 | 10.09303 |
| Cu      | -0.013198 | -2.555845 | 10.06855 |
| Cu      | -0.009953 | -5.121634 | 10.19319 |
| Cu      | 3.561069  | -5.112761 | 10.07753 |

Table 2: Structure of the most stable OH monomer at 0.167 ML, calculated within a (3×2) cell (Data for Fig. 3).

| Element | x         | y          | z        |
|---------|-----------|------------|----------|
| H       | -1.345038 | 3.869719   | 11.73879 |
| O       | -0.378630 | 3.845547   | 11.58723 |
| Cu      | 5.409000  | -1.274939  | 1.274914 |
| Cu      | 1.803000  | -1.274939  | 1.274914 |
| Cu      | 5.409000  | -3.824740  | 1.274914 |
| Cu      | 1.803000  | -3.824740  | 1.274914 |
| Cu      | 5.409000  | -6.374542  | 1.274914 |
| Cu      | 1.803000  | -6.374542  | 1.274914 |
| Cu      | 3.606000  | -5.099679  | 2.549827 |
| Cu      | 0.000000  | -5.099679  | 2.549827 |
| Cu      | 3.606000  | -2.549802  | 2.549827 |
| Cu      | 0.000000  | -2.549802  | 2.549827 |
| Cu      | 3.606000  | 0.000000   | 2.549827 |
| Cu      | 0.000000  | 0.000000   | 2.549827 |
| Cu      | 5.409000  | -3.824740  | 3.824741 |
| Cu      | 1.803000  | -3.824740  | 3.824741 |
| Cu      | 5.409000  | -6.374542  | 3.824741 |
| Cu      | 1.803000  | -6.374542  | 3.824741 |
| Cu      | 5.409000  | -1.274939  | 3.824741 |
| Cu      | 1.803000  | -1.274939  | 3.824741 |
| Cu      | 3.606000  | -5.099679  | 5.099654 |
| Cu      | 0.000000  | -5.099679  | 5.099654 |
| Cu      | 3.606000  | 0.000000   | 5.099654 |
| Cu      | 0.000000  | 0.000000   | 5.099654 |
| Cu      | 3.606000  | -2.549802  | 5.099654 |
| Cu      | 0.000000  | -2.549802  | 5.099654 |
| Cu      | 5.417510  | -1.275857  | 6.398434 |
| Cu      | 1.789441  | -1.272109  | 6.394150 |
| Cu      | 5.432150  | -3.824511  | 6.406797 |
| Cu      | 1.779345  | -3.826270  | 6.400270 |
| Cu      | 5.420106  | -6.370794  | 6.396598 |
| Cu      | 1.786917  | -6.377755  | 6.400474 |
| Cu      | 3.610327  | 0.005431   | 7.647033 |
| Cu      | -0.024160 | -0.0026008 | 7.657437 |
| Cu      | 3.605423  | -2.546130  | 7.644994 |
| Cu      | -0.007645 | -2.545212  | 7.712717 |
| Cu      | 3.606577  | -5.100291  | 7.646217 |
| Cu      | -0.008366 | -5.106793  | 7.721080 |
| Cu      | 5.399408  | -1.298576  | 9.000482 |
| Cu      | 1.786773  | -1.253520  | 8.956420 |
| Cu      | 1.779777  | -3.829177  | 8.948873 |
| Cu      | 1.777397  | -6.379361  | 8.975595 |
| Cu      | 5.394576  | -3.825276  | 8.979267 |
| Cu      | 5.405034  | -6.355724  | 9.001502 |
| Cu      | 3.594244  | 0.003672   | 10.11649 |
| Cu      | -0.006924 | 0.001989   | 10.10078 |
| Cu      | 3.540227  | -2.549113  | 10.10527 |
| Cu      | 0.085606  | -2.470629  | 10.26071 |
| Cu      | 0.047960  | -5.169443  | 10.29008 |
| Cu      | 3.550035  | -5.096467  | 10.10690 |

Table 3: Structure of the  $c(2 \times 2)$  1.0 ML  $\text{H}_2\text{O}$  phase favoured in this work, calculated in a  $(2 \times 2)$  cell (Data for Fig. 4).

| Element | x         | y         | z        |
|---------|-----------|-----------|----------|
| H       | -4.621089 | 2.819650  | 12.67101 |
| H       | -3.020746 | 1.145076  | 12.87908 |
| H       | 0.616987  | 3.792868  | 12.87703 |
| H       | 0.351801  | 1.129981  | 12.57167 |
| H       | -3.230110 | 3.587046  | 12.58166 |
| H       | -2.717986 | 0.371510  | 14.21763 |
| H       | 0.890826  | 3.011346  | 14.21763 |
| H       | -1.011122 | 0.304194  | 12.67386 |
| O       | -3.665932 | 2.723878  | 12.38624 |
| O       | -2.624303 | 0.302970  | 13.24992 |
| O       | 0.991722  | 2.941939  | 13.25074 |
| O       | -0.053585 | 0.249679  | 12.38808 |
| Cu      | -5.409000 | 1.274914  | 1.274914 |
| Cu      | -1.803000 | 1.274914  | 1.274914 |
| Cu      | -5.409000 | 3.824741  | 1.274914 |
| Cu      | -1.803000 | 3.824741  | 1.274914 |
| Cu      | -3.606000 | 2.549827  | 2.549827 |
| Cu      | 0.000000  | 2.549827  | 2.549827 |
| Cu      | -3.606000 | 0.000000  | 2.549827 |
| Cu      | 0.000000  | 0.000000  | 2.549827 |
| Cu      | -5.409000 | 3.824741  | 3.824741 |
| Cu      | -1.803000 | 3.824741  | 3.824741 |
| Cu      | -5.409000 | 1.274914  | 3.824741 |
| Cu      | -1.803000 | 1.274914  | 3.824741 |
| Cu      | -3.606000 | 2.549827  | 5.099654 |
| Cu      | 0.000000  | 2.549827  | 5.099654 |
| Cu      | -3.606000 | 0.000000  | 5.099654 |
| Cu      | 0.000000  | 0.000000  | 5.099654 |
| Cu      | -5.409216 | 1.279503  | 6.392314 |
| Cu      | -1.803433 | 1.279197  | 6.392111 |
| Cu      | -5.409937 | 3.815510  | 6.392927 |
| Cu      | -1.802784 | 3.815918  | 6.393131 |
| Cu      | -3.606721 | -0.003519 | 7.596241 |
| Cu      | -0.001298 | -0.001428 | 7.693542 |
| Cu      | -3.607082 | 2.549215  | 7.692726 |
| Cu      | -0.000865 | 2.541668  | 7.601953 |
| Cu      | -5.410803 | 3.822497  | 8.952545 |
| Cu      | -1.806173 | 3.823568  | 8.957237 |
| Cu      | -5.412245 | 1.283328  | 8.956829 |
| Cu      | -1.804731 | 1.282665  | 8.953361 |
| Cu      | -3.610255 | 0.006375  | 10.01225 |
| Cu      | -0.000649 | 0.006426  | 10.16993 |
| Cu      | -3.607731 | 2.548195  | 10.17136 |
| Cu      | -0.004616 | 2.575172  | 10.02225 |

Table 4: Structure of the  $(2 \times 1)$  0.5 ML H<sub>2</sub>O phase (Data for Fig. 6).

| Element | x         | y         | z        |
|---------|-----------|-----------|----------|
| H       | 0.673961  | -0.774586 | 12.57799 |
| H       | 1.125577  | 0.683609  | 12.26120 |
| O       | 0.331283  | 0.111580  | 12.34300 |
| Cu      | -1.803000 | 1.274914  | 1.274914 |
| Cu      | -1.803000 | 3.824741  | 1.274914 |
| Cu      | 0.000000  | 2.549827  | 2.549827 |
| Cu      | 0.000000  | 0.000000  | 2.549827 |
| Cu      | -1.803000 | 3.824741  | 3.824741 |
| Cu      | -1.803000 | 1.274914  | 3.824741 |
| Cu      | 0.000000  | 0.000000  | 5.099654 |
| Cu      | 0.000000  | 2.549827  | 5.099654 |
| Cu      | -1.804514 | 1.273384  | 6.403942 |
| Cu      | -1.804442 | 3.820304  | 6.403942 |
| Cu      | -0.004219 | -0.002448 | 7.711289 |
| Cu      | -0.000902 | 2.545798  | 7.630919 |
| Cu      | -1.811402 | 1.284246  | 9.016189 |
| Cu      | -1.811727 | 3.818570  | 9.014761 |
| Cu      | -0.022141 | 0.000153  | 10.18727 |
| Cu      | -0.015362 | 2.560791  | 10.09609 |

Table 5: Structure of the  $(2 \times 1)$  1.0 ML H<sub>2</sub>O/OH phase (Data for Fig. 6).

| Element | x         | y         | z        |
|---------|-----------|-----------|----------|
| H       | -0.450029 | -0.852764 | 12.31750 |
| H       | -1.691755 | 2.553652  | 12.06252 |
| H       | -0.448154 | 0.878824  | 12.30812 |
| O       | -0.043597 | 0.009434  | 12.00785 |
| O       | -0.715755 | 2.550490  | 12.00744 |
| Cu      | -1.803000 | 1.274914  | 1.274914 |
| Cu      | -1.803000 | 3.824741  | 1.274914 |
| Cu      | 0.000000  | 2.549827  | 2.549827 |
| Cu      | 0.000000  | 0.000000  | 2.549827 |
| Cu      | -1.803000 | 3.824741  | 3.824741 |
| Cu      | -1.803000 | 1.274914  | 3.824741 |
| Cu      | 0.000000  | 2.549827  | 5.099654 |
| Cu      | 0.000000  | 0.000000  | 5.099654 |
| Cu      | -1.811438 | 1.279911  | 6.365184 |
| Cu      | -1.811258 | 3.816377  | 6.364572 |
| Cu      | -0.021023 | -0.003468 | 7.647237 |
| Cu      | -0.019148 | 2.547175  | 7.690890 |
| Cu      | -1.852510 | 3.806688  | 8.893389 |
| Cu      | -1.851465 | 1.285521  | 8.891145 |
| Cu      | -0.011720 | -0.002142 | 10.06407 |
| Cu      | -0.140129 | 2.560332  | 10.17565 |

Table 6: Structure of the H<sub>2</sub>O→OH transition state (TS1), calculated at 0.167 ML in a (3×2) cell (Data for Fig. 8).

| Element | x         | y         | z        |
|---------|-----------|-----------|----------|
| H       | -0.336584 | 3.291495  | 7.341208 |
| H       | -2.334813 | 2.920649  | 5.910499 |
| O       | -0.722931 | 2.650086  | 6.714077 |
| Cu      | -5.409000 | 1.274939  | 1.274914 |
| Cu      | -1.803000 | 1.274939  | 1.274914 |
| Cu      | -5.409000 | 3.824741  | 1.274914 |
| Cu      | -1.803000 | 3.824741  | 1.274914 |
| Cu      | -5.409000 | 6.374542  | 1.274914 |
| Cu      | -1.803000 | 6.374542  | 1.274914 |
| Cu      | -3.606000 | 2.549802  | 2.549827 |
| Cu      | 0.000000  | 2.549802  | 2.549827 |
| Cu      | -3.606000 | 5.099680  | 2.549827 |
| Cu      | 0.000000  | 5.099680  | 2.549827 |
| Cu      | -3.606000 | 0.000000  | 2.549827 |
| Cu      | 0.000000  | 0.000000  | 2.549827 |
| Cu      | -5.392557 | 6.354501  | 3.875482 |
| Cu      | -1.803866 | 6.355418  | 3.868853 |
| Cu      | -5.395946 | 1.281288  | 3.815561 |
| Cu      | -1.794995 | 1.274557  | 3.849219 |
| Cu      | -5.401211 | 3.821834  | 3.815943 |
| Cu      | -1.793336 | 3.805081  | 3.899833 |
| Cu      | -3.605134 | 5.058372  | 5.010538 |
| Cu      | 0.021203  | 5.112301  | 4.983254 |
| Cu      | -3.607803 | -0.004360 | 4.979302 |
| Cu      | 0.016155  | -0.011398 | 4.977772 |
| Cu      | -3.611120 | 2.536950  | 5.052355 |
| Cu      | 0.147485  | 2.526318  | 5.081551 |



Table 7: Structure of the OH→O transition state (TS2), calculated at 0.167 ML in a (3×2) cell (Data for Fig. 8).

| Element | x         | y        | z        |
|---------|-----------|----------|----------|
| H       | -2.379744 | 3.847460 | 5.591643 |
| O       | -0.742836 | 3.872779 | 6.106071 |
| Cu      | -5.409000 | 1.274939 | 1.274914 |
| Cu      | -1.803000 | 1.274939 | 1.274914 |
| Cu      | -5.409000 | 3.824741 | 1.274914 |
| Cu      | -1.803000 | 3.824741 | 1.274914 |
| Cu      | -5.409000 | 6.374542 | 1.274914 |
| Cu      | -1.803000 | 6.374542 | 1.274914 |
| Cu      | -3.606000 | 2.549802 | 2.549827 |
| Cu      | 0.000000  | 2.549802 | 2.549827 |
| Cu      | -3.606000 | 5.099680 | 2.549827 |
| Cu      | 0.000000  | 5.099680 | 2.549827 |
| Cu      | -3.606000 | 0.000000 | 2.549827 |
| Cu      | 0.000000  | 0.000000 | 2.549827 |
| Cu      | -5.392124 | 6.349605 | 3.852916 |
| Cu      | -1.786557 | 6.381121 | 3.838509 |
| Cu      | -5.398254 | 1.309897 | 3.866685 |
| Cu      | -1.784537 | 1.272721 | 3.842589 |
| Cu      | -5.411957 | 3.822905 | 3.853809 |
| Cu      | -1.773503 | 3.825352 | 3.850621 |
| Cu      | -3.563593 | 5.070382 | 5.022649 |
| Cu      | 0.081568  | 5.190632 | 5.132037 |
| Cu      | -3.597346 | 0.000076 | 4.977262 |
| Cu      | 0.043777  | 0.009179 | 4.971143 |
| Cu      | -3.559122 | 2.576039 | 5.025072 |
| Cu      | 0.054883  | 2.492966 | 5.154858 |

Table 8: Structure of the H<sub>2</sub>O→OH transition state, calculated at 1.0 ML in a (2×2) cell (Data for Fig. 9).

| Element | x         | y         | z        |
|---------|-----------|-----------|----------|
| H       | -4.678424 | 2.917308  | 7.613783 |
| H       | -3.125681 | 0.847308  | 6.225148 |
| H       | 0.467193  | 3.787462  | 7.904718 |
| H       | 0.173232  | 1.091326  | 7.598357 |
| H       | -3.353868 | 3.877420  | 7.486164 |
| H       | -3.133614 | 0.834252  | 8.097996 |
| H       | 0.853468  | 3.003288  | 9.214182 |
| H       | -1.263975 | 0.267324  | 7.445240 |
| O       | -3.741081 | 2.939288  | 7.289318 |
| O       | -2.699307 | 0.150848  | 7.552715 |
| O       | 0.856714  | 2.931944  | 8.242061 |
| O       | -0.211672 | 0.254524  | 7.246863 |
| Cu      | -5.409000 | 1.274914  | 1.274914 |
| Cu      | -1.803000 | 1.274914  | 1.274914 |
| Cu      | -5.409000 | 3.824741  | 1.274914 |
| Cu      | -1.803000 | 3.824741  | 1.274914 |
| Cu      | -3.606000 | 2.549827  | 2.549827 |
| Cu      | 0.000000  | 2.549827  | 2.549827 |
| Cu      | -3.606000 | 0.000000  | 2.549827 |
| Cu      | 0.000000  | 0.000000  | 2.549827 |
| Cu      | -5.395225 | 3.789808  | 3.870893 |
| Cu      | -1.812881 | 3.792256  | 3.859291 |
| Cu      | -5.414409 | 1.270528  | 3.877012 |
| Cu      | -1.807472 | 1.273690  | 3.884406 |
| Cu      | -3.620064 | -0.042174 | 4.961453 |
| Cu      | 0.007500  | 0.006324  | 5.143128 |
| Cu      | -3.585806 | 2.421367  | 5.292166 |
| Cu      | 0.000938  | 2.575223  | 4.967445 |

Table 9: Structure I of the NH<sub>3</sub> monomer at 0.167 ML, calculated within a (3×2) cell (Data for Fig. 11).

| Element | x         | y         | z        |
|---------|-----------|-----------|----------|
| H       | 0.919097  | 2.753813  | 12.57860 |
| H       | -0.341416 | 1.674930  | 12.61226 |
| H       | -0.648431 | 3.302205  | 12.57534 |
| N       | -0.024304 | 2.569155  | 12.23876 |
| Cu      | -5.409000 | 1.274939  | 1.274914 |
| Cu      | -1.803000 | 1.274939  | 1.274914 |
| Cu      | -5.409000 | 3.824741  | 1.274914 |
| Cu      | -1.803000 | 3.824741  | 1.274914 |
| Cu      | -5.409000 | 6.374542  | 1.274914 |
| Cu      | -1.803000 | 6.374542  | 1.274914 |
| Cu      | -3.606000 | 5.099680  | 2.549827 |
| Cu      | 0.000000  | 5.099680  | 2.549827 |
| Cu      | -3.606000 | 2.549802  | 2.549827 |
| Cu      | 0.000000  | 2.549802  | 2.549827 |
| Cu      | -3.606000 | 0.000000  | 2.549827 |
| Cu      | 0.000000  | 0.000000  | 2.549827 |
| Cu      | -5.409000 | 3.824741  | 3.824741 |
| Cu      | -1.803000 | 3.824741  | 3.824741 |
| Cu      | -5.409000 | 6.374542  | 3.824741 |
| Cu      | -1.803000 | 6.374542  | 3.824741 |
| Cu      | -5.409000 | 1.274939  | 3.824741 |
| Cu      | -1.803000 | 1.274939  | 3.824741 |
| Cu      | -3.606000 | 5.099680  | 5.099654 |
| Cu      | 0.000000  | 5.099680  | 5.099654 |
| Cu      | -3.606000 | 0.000000  | 5.099654 |
| Cu      | 0.000000  | 0.000000  | 5.099654 |
| Cu      | -3.606000 | 2.549802  | 5.099654 |
| Cu      | 0.000000  | 2.549802  | 5.099654 |
| Cu      | -5.421549 | 1.278764  | 6.398842 |
| Cu      | -1.793552 | 1.278611  | 6.398638 |
| Cu      | -5.419169 | 3.819769  | 6.396394 |
| Cu      | -1.795860 | 3.820380  | 6.397822 |
| Cu      | -5.418159 | 6.375078  | 6.400066 |
| Cu      | -1.797230 | 6.374695  | 6.400270 |
| Cu      | -3.608669 | 2.546895  | 7.640914 |
| Cu      | -0.004399 | 2.550490  | 7.706189 |
| Cu      | -3.609534 | 5.098379  | 7.636018 |
| Cu      | -0.003390 | 5.093178  | 7.644994 |
| Cu      | -3.609029 | -0.001147 | 7.636426 |
| Cu      | -0.003822 | 0.000765  | 7.654377 |
| Cu      | -5.411380 | 6.368958  | 8.969884 |
| Cu      | -1.812881 | 6.366434  | 8.977839 |
| Cu      | -5.427030 | 1.265454  | 8.969068 |
| Cu      | -1.797591 | 1.263541  | 8.973147 |
| Cu      | -5.420323 | 3.821451  | 8.966008 |
| Cu      | -1.804370 | 3.822522  | 8.973147 |
| Cu      | -3.618693 | 5.087211  | 10.09487 |
| Cu      | -0.002164 | 5.118498  | 10.07855 |
| Cu      | -3.616313 | 0.005661  | 10.09079 |
| Cu      | -0.004039 | -0.034040 | 10.10364 |
| Cu      | -3.616818 | 2.545824  | 10.08834 |
| Cu      | -0.007789 | 2.546512  | 10.20318 |

Table 10: Structure II of the NH<sub>3</sub> monomer at 0.167 ML, calculated within a (3×2) cell (Data for Fig. 11).

| Element | x         | y         | z        |
|---------|-----------|-----------|----------|
| H       | 0.137893  | 2.681296  | 12.84542 |
| H       | -1.190845 | 1.813845  | 12.34443 |
| H       | -1.216160 | 3.462767  | 12.27895 |
| N       | -0.620016 | 2.640831  | 12.16594 |
| Cu      | -5.409000 | 1.274939  | 1.274914 |
| Cu      | -1.803000 | 1.274939  | 1.274914 |
| Cu      | -5.409000 | 3.824741  | 1.274914 |
| Cu      | -1.803000 | 3.824741  | 1.274914 |
| Cu      | -5.409000 | 6.374542  | 1.274914 |
| Cu      | -1.803000 | 6.374542  | 1.274914 |
| Cu      | -3.606000 | 5.099680  | 2.549827 |
| Cu      | 0.000000  | 5.099680  | 2.549827 |
| Cu      | -3.606000 | 2.549802  | 2.549827 |
| Cu      | 0.000000  | 2.549802  | 2.549827 |
| Cu      | -3.606000 | 0.000000  | 2.549827 |
| Cu      | 0.000000  | 0.000000  | 2.549827 |
| Cu      | -5.409000 | 3.824741  | 3.824741 |
| Cu      | -1.803000 | 3.824741  | 3.824741 |
| Cu      | -5.409000 | 6.374542  | 3.824741 |
| Cu      | -1.803000 | 6.374542  | 3.824741 |
| Cu      | -5.409000 | 1.274939  | 3.824741 |
| Cu      | -1.803000 | 1.274939  | 3.824741 |
| Cu      | -3.606000 | 5.099680  | 5.099654 |
| Cu      | 0.000000  | 5.099680  | 5.099654 |
| Cu      | -3.606000 | 0.000000  | 5.099654 |
| Cu      | 0.000000  | 0.000000  | 5.099654 |
| Cu      | -3.606000 | 2.549802  | 5.099654 |
| Cu      | 0.000000  | 2.549802  | 5.099654 |
| Cu      | -5.416140 | 1.281671  | 6.398638 |
| Cu      | -1.790018 | 1.279682  | 6.399250 |
| Cu      | -5.416500 | 3.821681  | 6.395578 |
| Cu      | -1.790163 | 3.823899  | 6.395782 |
| Cu      | -5.416429 | 6.377908  | 6.401086 |
| Cu      | -1.795716 | 6.377832  | 6.401494 |
| Cu      | -3.600014 | 2.553473  | 7.640506 |
| Cu      | -0.002019 | 2.553626  | 7.708637 |
| Cu      | -3.607082 | 5.104499  | 7.636631 |
| Cu      | -0.001154 | 5.100062  | 7.641730 |
| Cu      | -3.606505 | 0.003672  | 7.641526 |
| Cu      | -0.001442 | 0.007573  | 7.646421 |
| Cu      | -5.400634 | 6.389841  | 8.972127 |
| Cu      | -1.813602 | 6.388924  | 8.988446 |
| Cu      | -5.428689 | 1.288632  | 8.980287 |
| Cu      | -1.804587 | 1.283659  | 8.976207 |
| Cu      | -5.426814 | 3.836674  | 8.973556 |
| Cu      | -1.805524 | 3.842411  | 8.967232 |
| Cu      | -3.616024 | 5.099756  | 10.09854 |
| Cu      | 0.004039  | 5.137392  | 10.07121 |
| Cu      | -3.616313 | 0.014764  | 10.10935 |
| Cu      | 0.001298  | -0.012392 | 10.08671 |
| Cu      | -3.637156 | 2.556916  | 10.08712 |
| Cu      | 0.001515  | 2.561046  | 10.22215 |

Table 11: Structure III of the NH<sub>3</sub> monomer at 0.167 ML, calculated within a (3×2) cell (Data for Fig. 11).

| Element | x         | y         | z        |
|---------|-----------|-----------|----------|
| H       | -0.262228 | 3.475389  | 12.63062 |
| H       | -0.228548 | 1.821342  | 12.73812 |
| H       | -1.577697 | 2.590726  | 12.15431 |
| N       | -0.555685 | 2.609620  | 12.17981 |
| Cu      | -5.409000 | 1.274939  | 1.274914 |
| Cu      | -1.803000 | 1.274939  | 1.274914 |
| Cu      | -5.409000 | 3.824741  | 1.274914 |
| Cu      | -1.803000 | 3.824741  | 1.274914 |
| Cu      | -5.409000 | 6.374542  | 1.274914 |
| Cu      | -1.803000 | 6.374542  | 1.274914 |
| Cu      | -3.606000 | 5.099680  | 2.549827 |
| Cu      | 0.000000  | 5.099680  | 2.549827 |
| Cu      | -3.606000 | 2.549802  | 2.549827 |
| Cu      | 0.000000  | 2.549802  | 2.549827 |
| Cu      | -3.606000 | 0.000000  | 2.549827 |
| Cu      | 0.000000  | 0.000000  | 2.549827 |
| Cu      | -5.409000 | 3.824741  | 3.824741 |
| Cu      | -1.803000 | 3.824741  | 3.824741 |
| Cu      | -5.409000 | 6.374542  | 3.824741 |
| Cu      | -1.803000 | 6.374542  | 3.824741 |
| Cu      | -5.409000 | 1.274939  | 3.824741 |
| Cu      | -1.803000 | 1.274939  | 3.824741 |
| Cu      | -3.606000 | 5.099680  | 5.099654 |
| Cu      | 0.000000  | 5.099680  | 5.099654 |
| Cu      | -3.606000 | 0.000000  | 5.099654 |
| Cu      | 0.000000  | 0.000000  | 5.099654 |
| Cu      | -3.606000 | 2.549802  | 5.099654 |
| Cu      | 0.000000  | 2.549802  | 5.099654 |
| Cu      | -5.419241 | 1.277387  | 6.402514 |
| Cu      | -1.790812 | 1.275857  | 6.405166 |
| Cu      | -5.418303 | 3.817168  | 6.403330 |
| Cu      | -1.791317 | 3.818851  | 6.406185 |
| Cu      | -5.419746 | 6.372247  | 6.404146 |
| Cu      | -1.795788 | 6.372630  | 6.407002 |
| Cu      | -3.599870 | 2.549266  | 7.645401 |
| Cu      | -0.001010 | 2.550184  | 7.716797 |
| Cu      | -3.607731 | 5.101210  | 7.645810 |
| Cu      | -0.001875 | 5.094861  | 7.648053 |
| Cu      | -3.608380 | -0.001224 | 7.645810 |
| Cu      | -0.001803 | 0.003825  | 7.653357 |
| Cu      | -5.403591 | 6.379209  | 8.984366 |
| Cu      | -1.815188 | 6.379515  | 8.995994 |
| Cu      | -5.425948 | 1.276698  | 8.986610 |
| Cu      | -1.803866 | 1.270885  | 8.983347 |
| Cu      | -5.424578 | 3.830554  | 8.986202 |
| Cu      | -1.805164 | 3.833232  | 8.980287 |
| Cu      | -3.615664 | 5.095549  | 10.11812 |
| Cu      | 0.001803  | 5.128212  | 10.07896 |
| Cu      | -3.616241 | 0.009638  | 10.11955 |
| Cu      | 0.002308  | -0.020195 | 10.09446 |
| Cu      | -3.636146 | 2.551714  | 10.09752 |
| Cu      | 0.012188  | 2.548501  | 10.22379 |

Table 12: Structure of the NH monomer at 0.167 ML, calculated within a (3×2) cell (Data for Fig. 12).

| Element | x         | y         | z        |
|---------|-----------|-----------|----------|
| H       | -1.456824 | 3.822140  | 11.73369 |
| N       | -1.000377 | 3.812807  | 10.82106 |
| Cu      | -5.409000 | 1.274939  | 1.274914 |
| Cu      | -1.803000 | 1.274939  | 1.274914 |
| Cu      | -5.409000 | 3.824741  | 1.274914 |
| Cu      | -1.803000 | 3.824741  | 1.274914 |
| Cu      | -5.409000 | 6.374542  | 1.274914 |
| Cu      | -1.803000 | 6.374542  | 1.274914 |
| Cu      | -3.606000 | 5.099680  | 2.549827 |
| Cu      | 0.000000  | 5.099680  | 2.549827 |
| Cu      | -3.606000 | 2.549802  | 2.549827 |
| Cu      | 0.000000  | 2.549802  | 2.549827 |
| Cu      | -3.606000 | 0.000000  | 2.549827 |
| Cu      | 0.000000  | 0.000000  | 2.549827 |
| Cu      | -5.409000 | 3.824741  | 3.824741 |
| Cu      | -1.803000 | 3.824741  | 3.824741 |
| Cu      | -5.409000 | 6.374542  | 3.824741 |
| Cu      | -1.803000 | 6.374542  | 3.824741 |
| Cu      | -5.409000 | 1.274939  | 3.824741 |
| Cu      | -1.803000 | 1.274939  | 3.824741 |
| Cu      | -3.606000 | 5.099680  | 5.099654 |
| Cu      | 0.000000  | 5.099680  | 5.099654 |
| Cu      | -3.606000 | 0.000000  | 5.099654 |
| Cu      | 0.000000  | 0.000000  | 5.099654 |
| Cu      | -3.606000 | 2.549802  | 5.099654 |
| Cu      | 0.000000  | 2.549802  | 5.099654 |
| Cu      | -5.411236 | 1.270655  | 6.380891 |
| Cu      | -1.788215 | 1.276316  | 6.390275 |
| Cu      | -5.420828 | 3.822599  | 6.346826 |
| Cu      | -1.791172 | 3.824052  | 6.436172 |
| Cu      | -5.411163 | 6.377526  | 6.379463 |
| Cu      | -1.788648 | 6.372247  | 6.385787 |
| Cu      | -3.585446 | 2.546512  | 7.626431 |
| Cu      | -0.009376 | 2.549419  | 7.651113 |
| Cu      | -3.587032 | 5.100292  | 7.624187 |
| Cu      | -0.009087 | 5.096314  | 7.648461 |
| Cu      | -3.578738 | -0.003595 | 7.638466 |
| Cu      | -0.001010 | -0.001759 | 7.640914 |
| Cu      | -5.414121 | 6.367428  | 8.915828 |
| Cu      | -1.795427 | 6.382192  | 8.976819 |
| Cu      | -5.415851 | 1.264077  | 8.918683 |
| Cu      | -1.792110 | 1.251226  | 8.985591 |
| Cu      | -5.414409 | 3.817626  | 8.869726 |
| Cu      | -1.865600 | 3.815638  | 9.062697 |
| Cu      | -3.704299 | 5.118039  | 10.08610 |
| Cu      | 0.119142  | 5.170132  | 10.20216 |
| Cu      | -3.643430 | -0.004360 | 10.09772 |
| Cu      | 0.055388  | -0.005355 | 10.09303 |
| Cu      | -3.706391 | 2.522493  | 10.09222 |
| Cu      | 0.120296  | 2.450894  | 10.20808 |

Table 13: Structure of the NH<sub>2</sub> monomer at 0.167 ML, calculated within a (3×2) cell (Data for Fig. 12).

| Element | x         | y        | z        |
|---------|-----------|----------|----------|
| H       | -0.855199 | 3.875916 | 12.22489 |
| H       | 0.799018  | 3.872244 | 12.25529 |
| N       | -0.017309 | 3.870561 | 11.64843 |
| Cu      | -5.409000 | 1.274939 | 1.274914 |
| Cu      | -1.803000 | 1.274939 | 1.274914 |
| Cu      | -5.409000 | 3.824741 | 1.274914 |
| Cu      | -1.803000 | 3.824741 | 1.274914 |
| Cu      | -5.409000 | 6.374542 | 1.274914 |
| Cu      | -1.803000 | 6.374542 | 1.274914 |
| Cu      | -3.606000 | 5.099680 | 2.549827 |
| Cu      | 0.000000  | 5.099680 | 2.549827 |
| Cu      | -3.606000 | 2.549802 | 2.549827 |
| Cu      | 0.000000  | 2.549802 | 2.549827 |
| Cu      | -3.606000 | 0.000000 | 2.549827 |
| Cu      | 0.000000  | 0.000000 | 2.549827 |
| Cu      | -5.409000 | 3.824741 | 3.824741 |
| Cu      | -1.803000 | 3.824741 | 3.824741 |
| Cu      | -5.409000 | 6.374542 | 3.824741 |
| Cu      | -1.803000 | 6.374542 | 3.824741 |
| Cu      | -5.409000 | 1.274939 | 3.824741 |
| Cu      | -1.803000 | 1.274939 | 3.824741 |
| Cu      | -3.606000 | 5.099680 | 5.099654 |
| Cu      | 0.000000  | 5.099680 | 5.099654 |
| Cu      | -3.606000 | 0.000000 | 5.099654 |
| Cu      | 0.000000  | 0.000000 | 5.099654 |
| Cu      | -3.606000 | 2.549802 | 5.099654 |
| Cu      | 0.000000  | 2.549802 | 5.099654 |
| Cu      | -5.424578 | 1.271114 | 6.385787 |
| Cu      | -1.790451 | 1.271420 | 6.389867 |
| Cu      | -5.426381 | 3.817856 | 6.363756 |
| Cu      | -1.788432 | 3.817626 | 6.366205 |
| Cu      | -5.420755 | 6.378061 | 6.370080 |
| Cu      | -1.793913 | 6.377985 | 6.373956 |
| Cu      | -3.609029 | 2.545212 | 7.623983 |
| Cu      | -0.005048 | 2.549955 | 7.676611 |
| Cu      | -3.608813 | 5.111001 | 7.610520 |
| Cu      | -0.004832 | 5.108553 | 7.664576 |
| Cu      | -3.607226 | 0.005049 | 7.626839 |
| Cu      | -0.004760 | 0.002218 | 7.643362 |
| Cu      | -5.430852 | 6.383569 | 8.933983 |
| Cu      | -1.789874 | 6.382268 | 8.949485 |
| Cu      | -5.435685 | 1.304772 | 8.968252 |
| Cu      | -1.787927 | 1.305919 | 8.977839 |
| Cu      | -5.418736 | 3.849754 | 8.892165 |
| Cu      | -1.807183 | 3.850290 | 8.898081 |
| Cu      | -3.620568 | 5.104805 | 10.04102 |
| Cu      | 0.003750  | 5.156974 | 10.21991 |
| Cu      | -3.618477 | 0.004513 | 10.05693 |
| Cu      | 0.000000  | 0.014458 | 10.07243 |
| Cu      | -3.622588 | 2.568543 | 10.05652 |
| Cu      | -0.000361 | 2.553320 | 10.23358 |

Table 14: Structure of the  $(2 \times 1)$  0.5 ML  $\text{NH}_3$  phase (Data for Fig. 13, structure I).

| Element | x         | y         | z        |
|---------|-----------|-----------|----------|
| H       | 0.266736  | -0.421639 | 12.93191 |
| H       | 0.175468  | 1.232892  | 12.72445 |
| H       | 1.509436  | 0.405627  | 12.19695 |
| N       | 0.496041  | 0.355599  | 12.31240 |
| Cu      | -1.803000 | 1.274914  | 1.274914 |
| Cu      | -1.803000 | 3.824741  | 1.274914 |
| Cu      | 0.000000  | 2.549827  | 2.549827 |
| Cu      | 0.000000  | 0.000000  | 2.549827 |
| Cu      | -1.803000 | 3.824741  | 3.824741 |
| Cu      | -1.803000 | 1.274914  | 3.824741 |
| Cu      | 0.000000  | 0.000000  | 5.099654 |
| Cu      | 0.000000  | 2.549827  | 5.099654 |
| Cu      | -1.803541 | 1.303676  | 6.404758 |
| Cu      | -1.804010 | 3.868853  | 6.401902 |
| Cu      | -0.002596 | 0.052271  | 7.731484 |
| Cu      | 0.004976  | 2.616531  | 7.616028 |
| Cu      | -1.803541 | 1.365534  | 8.998646 |
| Cu      | -1.805272 | 3.939891  | 9.024960 |
| Cu      | -0.008438 | 0.134274  | 10.25377 |
| Cu      | -0.003498 | 2.668343  | 10.05509 |

Table 15: Structure of the  $(2 \times 1)$  1.0 ML  $\text{NH}_3$  phase (Data for Fig. 13, structure II).

| Element | x         | y         | z        |
|---------|-----------|-----------|----------|
| H       | 1.014368  | -0.338209 | 12.91375 |
| H       | 0.178786  | 1.124729  | 12.85011 |
| H       | 1.524545  | 0.841443  | 11.89688 |
| H       | -1.257737 | 2.900377  | 14.44508 |
| H       | -1.730772 | 2.555437  | 12.90335 |
| H       | -0.565926 | 3.661501  | 13.13528 |
| N       | 0.687953  | 0.411491  | 12.30424 |
| N       | -0.928112 | 2.778241  | 13.48920 |
| Cu      | -1.803000 | 1.274914  | 1.274914 |
| Cu      | -1.803000 | 3.824741  | 1.274914 |
| Cu      | 0.000000  | 2.549827  | 2.549827 |
| Cu      | 0.000000  | 0.000000  | 2.549827 |
| Cu      | -1.803000 | 3.824741  | 3.824741 |
| Cu      | -1.803000 | 1.274914  | 3.824741 |
| Cu      | 0.000000  | 0.000000  | 5.099654 |
| Cu      | 0.000000  | 2.549827  | 5.099654 |
| Cu      | -1.798492 | 1.268845  | 6.412714 |
| Cu      | -1.797735 | 3.822803  | 6.412101 |
| Cu      | 0.005553  | -0.003978 | 7.753310 |
| Cu      | 0.015722  | 2.542382  | 7.631735 |
| Cu      | -1.795031 | 1.269763  | 9.034751 |
| Cu      | -1.796401 | 3.833869  | 9.040463 |
| Cu      | -0.012369 | -0.009077 | 10.34169 |
| Cu      | -0.001659 | 2.569920  | 10.06549 |



Table 16: Structure of the  $(2 \times 1)$  1.0 ML  $\text{NH}_3$  phase (Data for Fig. 13, structure III).

| Element | x         | y         | z        |
|---------|-----------|-----------|----------|
| H       | -1.040295 | -0.649900 | 12.53209 |
| H       | -1.486862 | 0.820738  | 11.93829 |
| H       | -0.106702 | 0.722723  | 12.85358 |
| H       | 1.055512  | 2.816029  | 12.51985 |
| H       | 1.923080  | 2.328094  | 13.84617 |
| H       | 0.676305  | 3.385303  | 14.03588 |
| N       | -0.682508 | 0.229739  | 12.16023 |
| N       | 0.987756  | 2.567472  | 13.51510 |
| Cu      | -1.803000 | 1.274914  | 1.274914 |
| Cu      | -1.803000 | 3.824741  | 1.274914 |
| Cu      | 0.000000  | 2.549827  | 2.549827 |
| Cu      | 0.000000  | 0.000000  | 2.549827 |
| Cu      | -1.803000 | 3.824741  | 3.824741 |
| Cu      | -1.803000 | 1.274914  | 3.824741 |
| Cu      | 0.000000  | 0.000000  | 5.099654 |
| Cu      | 0.000000  | 2.549827  | 5.099654 |
| Cu      | -1.804334 | 1.261093  | 6.382523 |
| Cu      | -1.804010 | 3.819743  | 6.384359 |
| Cu      | -0.001911 | -0.006834 | 7.705781 |
| Cu      | -0.010205 | 2.536874  | 7.586246 |
| Cu      | -1.809166 | 1.287918  | 8.948873 |
| Cu      | -1.808734 | 3.835960  | 8.951729 |
| Cu      | 0.005012  | 0.009842  | 10.21359 |
| Cu      | 0.006311  | 2.591389  | 10.01898 |

Table 17: Structure of the near-c(2×2) 0.5 ML NH<sub>3</sub> phase, calculated in a (2×2) cell (Data for Fig. 14, structure I).

| Element | x         | y         | z        |
|---------|-----------|-----------|----------|
| H       | -4.572552 | 2.808635  | 12.52373 |
| H       | -3.183305 | 1.901712  | 12.65857 |
| H       | 0.412815  | -0.528273 | 12.69712 |
| H       | 0.437264  | 1.115549  | 12.42643 |
| H       | -3.089549 | 3.555530  | 12.50680 |
| H       | -1.011194 | 0.307305  | 12.47620 |
| N       | -3.602466 | 2.719697  | 12.21530 |
| N       | -0.031228 | 0.236012  | 12.19266 |
| Cu      | -5.409000 | 1.274914  | 1.274914 |
| Cu      | -1.803000 | 1.274914  | 1.274914 |
| Cu      | -5.409000 | 3.824741  | 1.274914 |
| Cu      | -1.803000 | 3.824741  | 1.274914 |
| Cu      | -3.606000 | 2.549827  | 2.549827 |
| Cu      | 0.000000  | 2.549827  | 2.549827 |
| Cu      | -3.606000 | 0.000000  | 2.549827 |
| Cu      | 0.000000  | 0.000000  | 2.549827 |
| Cu      | -5.409000 | 3.824741  | 3.824741 |
| Cu      | -1.803000 | 3.824741  | 3.824741 |
| Cu      | -5.409000 | 1.274914  | 3.824741 |
| Cu      | -1.803000 | 1.274914  | 3.824741 |
| Cu      | -3.606000 | 2.549827  | 5.099654 |
| Cu      | 0.000000  | 2.549827  | 5.099654 |
| Cu      | -3.606000 | 0.000000  | 5.099654 |
| Cu      | 0.000000  | 0.000000  | 5.099654 |
| Cu      | -5.408423 | 1.294190  | 6.370896 |
| Cu      | -1.802711 | 1.293782  | 6.371916 |
| Cu      | -5.407774 | 3.831829  | 6.366816 |
| Cu      | -1.803793 | 3.832033  | 6.367428 |
| Cu      | -3.606577 | 0.024478  | 7.580942 |
| Cu      | 0.001803  | 0.026518  | 7.672328 |
| Cu      | -3.604774 | 2.587208  | 7.682731 |
| Cu      | -0.000361 | 2.584403  | 7.584614 |
| Cu      | -5.404961 | 3.871046  | 8.912155 |
| Cu      | -1.805092 | 3.877675  | 8.912360 |
| Cu      | -5.409721 | 1.324278  | 8.911544 |
| Cu      | -1.800404 | 1.323615  | 8.913176 |
| Cu      | -3.607442 | 0.054209  | 9.998586 |
| Cu      | 0.007645  | 0.035545  | 10.15566 |
| Cu      | -3.600807 | 2.606331  | 10.16422 |
| Cu      | -0.000288 | 2.620712  | 9.999198 |

Table 18: Structure of the  $(2 \times 2)$  1.0 ML  $\text{NH}_3$  bilayer phase (Data for Fig. 14, structure II).

| Element | x         | y         | z        |
|---------|-----------|-----------|----------|
| H       | -3.557824 | 2.955403  | 14.39122 |
| H       | -1.928056 | 2.920062  | 14.49485 |
| H       | 0.495969  | 0.472432  | 14.21763 |
| H       | -0.365216 | 0.450911  | 12.79340 |
| H       | -2.615792 | 2.995945  | 13.02513 |
| H       | -3.609173 | 1.040278  | 12.70997 |
| H       | -5.059578 | 0.652399  | 11.94849 |
| H       | 0.366730  | 3.654922  | 12.65632 |
| H       | 1.700878  | 3.047196  | 11.81508 |
| H       | -1.149160 | 0.595436  | 14.21682 |
| H       | -4.176252 | -0.515320 | 12.72914 |
| H       | 0.761227  | 2.072856  | 12.79728 |
| N       | -2.719213 | 2.578283  | 13.95163 |
| N       | -0.352667 | 0.140802  | 13.76825 |
| N       | -4.116610 | 0.331427  | 12.17043 |
| N       | 0.749904  | 2.853817  | 12.14330 |
| Cu      | -5.409000 | 1.274914  | 1.274914 |
| Cu      | -1.803000 | 1.274914  | 1.274914 |
| Cu      | -5.409000 | 3.824741  | 1.274914 |
| Cu      | -1.803000 | 3.824741  | 1.274914 |
| Cu      | -3.606000 | 2.549827  | 2.549827 |
| Cu      | 0.000000  | 2.549827  | 2.549827 |
| Cu      | -3.606000 | 0.000000  | 2.549827 |
| Cu      | 0.000000  | 0.000000  | 2.549827 |
| Cu      | -5.409000 | 3.824741  | 3.824741 |
| Cu      | -1.803000 | 3.824741  | 3.824741 |
| Cu      | -5.409000 | 1.274914  | 3.824741 |
| Cu      | -1.803000 | 1.274914  | 3.824741 |
| Cu      | -3.606000 | 2.549827  | 5.099654 |
| Cu      | 0.000000  | 2.549827  | 5.099654 |
| Cu      | -3.606000 | 0.000000  | 5.099654 |
| Cu      | 0.000000  | 0.000000  | 5.099654 |
| Cu      | -5.411091 | 1.275118  | 6.381299 |
| Cu      | -1.797879 | 1.275679  | 6.382523 |
| Cu      | -5.405682 | 3.814439  | 6.381707 |
| Cu      | -1.802423 | 3.813980  | 6.381707 |
| Cu      | -3.593740 | -0.008465 | 7.692523 |
| Cu      | 0.003894  | -0.012953 | 7.596649 |
| Cu      | -3.606216 | 2.521983  | 7.594405 |
| Cu      | 0.002308  | 2.542076  | 7.690687 |
| Cu      | -5.403519 | 3.815918  | 8.917459 |
| Cu      | -1.793624 | 3.816683  | 8.930106 |
| Cu      | -5.403952 | 1.273078  | 8.921131 |
| Cu      | -1.792615 | 1.280982  | 8.933983 |
| Cu      | -3.564964 | -0.001581 | 10.19584 |
| Cu      | -0.008510 | 0.008006  | 10.01348 |
| Cu      | -3.584436 | 2.575478  | 10.00103 |
| Cu      | -0.015001 | 2.539118  | 10.20890 |

Table 19: Structure of the  $\text{NH}_3 \rightarrow \text{NH}_2$  transition state (TS1), calculated at 0.167 ML in a (3×2) cell (Data for Fig. 16).

| Element | x         | y        | z        |
|---------|-----------|----------|----------|
| H       | 0.749687  | 3.870867 | 7.285111 |
| H       | -0.062961 | 2.175589 | 6.573837 |
| H       | -0.909289 | 3.874233 | 7.203134 |
| N       | -0.050268 | 3.833690 | 6.651989 |
| Cu      | -5.409000 | 1.274939 | 1.274914 |
| Cu      | -1.803000 | 1.274939 | 1.274914 |
| Cu      | -5.409000 | 3.824740 | 1.274914 |
| Cu      | -1.803000 | 3.824740 | 1.274914 |
| Cu      | -5.409000 | 6.374542 | 1.274914 |
| Cu      | -1.803000 | 6.374542 | 1.274914 |
| Cu      | -3.606000 | 2.549802 | 2.549827 |
| Cu      | 0.000000  | 2.549802 | 2.549827 |
| Cu      | -3.606000 | 5.099679 | 2.549827 |
| Cu      | 0.000000  | 5.099679 | 2.549827 |
| Cu      | -3.606000 | 0.000000 | 2.549827 |
| Cu      | 0.000000  | 0.000000 | 2.549827 |
| Cu      | -5.435468 | 6.368728 | 3.875992 |
| Cu      | -1.776965 | 6.369187 | 3.875355 |
| Cu      | -5.418664 | 1.281824 | 3.866685 |
| Cu      | -1.793697 | 1.282512 | 3.867068 |
| Cu      | -5.417655 | 3.828336 | 3.815179 |
| Cu      | -1.795932 | 3.828565 | 3.806637 |
| Cu      | -3.606505 | 5.106870 | 4.974457 |
| Cu      | 0.000072  | 5.105722 | 5.125535 |
| Cu      | -3.606721 | 0.002065 | 4.976752 |
| Cu      | -0.000793 | 0.021189 | 5.056307 |
| Cu      | -3.607298 | 2.556915 | 4.972673 |
| Cu      | 0.001731  | 2.511554 | 5.100292 |

Table 20: Structure of the  $\text{NH}_2 \rightarrow \text{NH}$  transition state (TS2), calculated at 0.167 ML in a  $(3 \times 2)$  cell (Data for Fig. 16).

| Element | x         | y         | z        |
|---------|-----------|-----------|----------|
| H       | -0.229774 | 5.312641  | 6.734476 |
| H       | 1.204548  | 3.786340  | 7.041985 |
| N       | 0.566719  | 3.739831  | 6.248351 |
| Cu      | -5.409000 | 1.274939  | 1.274914 |
| Cu      | -1.803000 | 1.274939  | 1.274914 |
| Cu      | -5.409000 | 3.824740  | 1.274914 |
| Cu      | -1.803000 | 3.824740  | 1.274914 |
| Cu      | -5.409000 | 6.374542  | 1.274914 |
| Cu      | -1.803000 | 6.374542  | 1.274914 |
| Cu      | -3.606000 | 2.549802  | 2.549827 |
| Cu      | 0.000000  | 2.549802  | 2.549827 |
| Cu      | -3.606000 | 5.099679  | 2.549827 |
| Cu      | 0.000000  | 5.099679  | 2.549827 |
| Cu      | -3.606000 | 0.000000  | 2.549827 |
| Cu      | 0.000000  | 0.000000  | 2.549827 |
| Cu      | -5.424145 | 6.367810  | 3.846032 |
| Cu      | -1.766147 | 6.340961  | 3.877267 |
| Cu      | -5.411308 | 1.257039  | 3.837107 |
| Cu      | -1.785331 | 1.276010  | 3.820023 |
| Cu      | -5.430924 | 3.833843  | 3.907355 |
| Cu      | -1.791172 | 3.819768  | 3.800390 |
| Cu      | -3.589773 | 5.113219  | 4.983254 |
| Cu      | -0.017237 | 5.177781  | 5.258508 |
| Cu      | -3.599004 | -0.003519 | 4.982234 |
| Cu      | -0.019184 | -0.013081 | 5.017040 |
| Cu      | -3.596913 | 2.532284  | 4.972418 |
| Cu      | -0.022934 | 2.428404  | 5.120053 |

Table 21: Structure of the NH  $\rightarrow$ N transition state (TS3), calculated at 0.167 ML in a (3 $\times$ 2) cell (Data for Fig. 16).

| Element | x         | y        | z        |
|---------|-----------|----------|----------|
| H       | -2.862371 | 3.825276 | 5.908842 |
| N       | -1.069035 | 3.825276 | 5.664696 |
| Cu      | -5.409000 | 1.274939 | 1.274914 |
| Cu      | -1.803000 | 1.274939 | 1.274914 |
| Cu      | -5.409000 | 3.824740 | 1.274914 |
| Cu      | -1.803000 | 3.824740 | 1.274914 |
| Cu      | -5.409000 | 6.374542 | 1.274914 |
| Cu      | -1.803000 | 6.374542 | 1.274914 |
| Cu      | -3.606000 | 2.549802 | 2.549827 |
| Cu      | 0.000000  | 2.549802 | 2.549827 |
| Cu      | -3.606000 | 5.099679 | 2.549827 |
| Cu      | 0.000000  | 5.099679 | 2.549827 |
| Cu      | -3.606000 | 0.000000 | 2.549827 |
| Cu      | 0.000000  | 0.000000 | 2.549827 |
| Cu      | -5.396019 | 6.347386 | 3.862733 |
| Cu      | -1.816486 | 6.381426 | 3.861586 |
| Cu      | -5.396163 | 1.302554 | 3.862988 |
| Cu      | -1.816631 | 1.267978 | 3.861076 |
| Cu      | -5.412750 | 3.824740 | 3.871912 |
| Cu      | -1.817568 | 3.825046 | 3.854191 |
| Cu      | -3.636290 | 5.093637 | 5.097487 |
| Cu      | 0.020410  | 5.172349 | 5.093024 |
| Cu      | -3.622299 | 0.000000 | 4.985677 |
| Cu      | 0.023872  | 0.000306 | 4.970888 |
| Cu      | -3.636074 | 2.556533 | 5.097614 |
| Cu      | 0.020194  | 2.477973 | 5.092642 |

Table 22: Structure of the (2×2) 0.5 ML H<sub>2</sub>O/NH<sub>3</sub> phase (Data for Fig. 19, structure I).

| Element | x         | y         | z        |
|---------|-----------|-----------|----------|
| H       | -4.437255 | 2.828268  | 12.68835 |
| H       | 0.976144  | 0.632663  | 12.14146 |
| H       | -3.028896 | 3.662419  | 12.47437 |
| H       | -2.979998 | 2.034966  | 12.71466 |
| H       | 0.268863  | -0.735727 | 12.27609 |
| N       | -3.508349 | 2.784819  | 12.26589 |
| O       | 0.192777  | 0.205210  | 12.54597 |
| Cu      | -5.409000 | 1.274914  | 1.274914 |
| Cu      | -1.803000 | 1.274914  | 1.274914 |
| Cu      | -5.409000 | 3.824741  | 1.274914 |
| Cu      | -1.803000 | 3.824741  | 1.274914 |
| Cu      | -3.606000 | 2.549827  | 2.549827 |
| Cu      | 0.000000  | 2.549827  | 2.549827 |
| Cu      | -3.606000 | 0.000000  | 2.549827 |
| Cu      | 0.000000  | 0.000000  | 2.549827 |
| Cu      | -5.409000 | 3.824741  | 3.824741 |
| Cu      | -1.803000 | 3.824741  | 3.824741 |
| Cu      | -5.409000 | 1.274914  | 3.824741 |
| Cu      | -1.803000 | 1.274914  | 3.824741 |
| Cu      | -3.606000 | 2.549827  | 5.099654 |
| Cu      | 0.000000  | 2.549827  | 5.099654 |
| Cu      | -3.606000 | 0.000000  | 5.099654 |
| Cu      | 0.000000  | 0.000000  | 5.099654 |
| Cu      | -5.403735 | 1.285113  | 6.364164 |
| Cu      | -1.816703 | 1.285929  | 6.352537 |
| Cu      | -5.406115 | 3.817142  | 6.367224 |
| Cu      | -1.814539 | 3.815663  | 6.355801 |
| Cu      | -3.613861 | 0.008567  | 7.574007 |
| Cu      | -0.004327 | 0.005202  | 7.583390 |
| Cu      | -3.620064 | 2.565993  | 7.688239 |
| Cu      | -0.002596 | 2.547073  | 7.574210 |
| Cu      | -5.416212 | 3.850851  | 8.913380 |
| Cu      | -1.817063 | 3.840397  | 8.884210 |
| Cu      | -5.419457 | 1.309030  | 8.916439 |
| Cu      | -1.814756 | 1.312855  | 8.883189 |
| Cu      | -3.607659 | 0.035953  | 9.986143 |
| Cu      | -0.042551 | 0.041766  | 10.01225 |
| Cu      | -3.607659 | 2.589400  | 10.20033 |
| Cu      | -0.013775 | 2.615409  | 10.01001 |

Table 23: Structure of the (2×2) 1.0 ML H<sub>2</sub>O/NH<sub>3</sub> phase (Data for Fig. 19, structure II).

| Element | x         | y        | z        |
|---------|-----------|----------|----------|
| H       | -3.603043 | 2.577875 | 14.39041 |
| H       | -1.997003 | 2.241145 | 14.18132 |
| H       | 0.330887  | 0.281552 | 14.85590 |
| H       | 0.368389  | 1.084492 | 13.40720 |
| H       | -2.820036 | 3.134043 | 13.05552 |
| H       | -3.463563 | 1.035740 | 12.81053 |
| H       | -4.863628 | 0.506396 | 12.27528 |
| H       | 0.689900  | 3.790777 | 13.15017 |
| H       | 1.675348  | 3.120376 | 12.09964 |
| H       | -0.914914 | 0.108827 | 13.78600 |
| N       | -2.888767 | 2.345994 | 13.70236 |
| N       | 0.094333  | 0.207760 | 13.86861 |
| O       | -3.919578 | 0.259725 | 12.32423 |
| O       | 0.979750  | 2.908792 | 12.75464 |
| Cu      | -5.409000 | 1.274914 | 1.274914 |
| Cu      | -1.803000 | 1.274914 | 1.274914 |
| Cu      | -5.409000 | 3.824741 | 1.274914 |
| Cu      | -1.803000 | 3.824741 | 1.274914 |
| Cu      | -3.606000 | 2.549827 | 2.549827 |
| Cu      | 0.000000  | 2.549827 | 2.549827 |
| Cu      | -3.606000 | 0.000000 | 2.549827 |
| Cu      | 0.000000  | 0.000000 | 2.549827 |
| Cu      | -5.409000 | 3.824741 | 3.824741 |
| Cu      | -1.803000 | 3.824741 | 3.824741 |
| Cu      | -5.409000 | 1.274914 | 3.824741 |
| Cu      | -1.803000 | 1.274914 | 3.824741 |
| Cu      | -3.606000 | 2.549827 | 5.099654 |
| Cu      | 0.000000  | 2.549827 | 5.099654 |
| Cu      | -3.606000 | 0.000000 | 5.099654 |
| Cu      | 0.000000  | 0.000000 | 5.099654 |
| Cu      | -5.409649 | 1.283838 | 6.392519 |
| Cu      | -1.802567 | 1.284144 | 6.395375 |
| Cu      | -5.408423 | 3.821630 | 6.390887 |
| Cu      | -1.803866 | 3.822344 | 6.392927 |
| Cu      | -3.599653 | 0.007904 | 7.694970 |
| Cu      | -0.003822 | 0.007700 | 7.609908 |
| Cu      | -3.601889 | 2.554264 | 7.609908 |
| Cu      | -0.006419 | 2.563647 | 7.666208 |
| Cu      | -5.411596 | 3.842997 | 8.939489 |
| Cu      | -1.795716 | 3.841467 | 8.967640 |
| Cu      | -5.413327 | 1.300514 | 8.942346 |
| Cu      | -1.794634 | 1.303829 | 8.981715 |
| Cu      | -3.590783 | 0.017798 | 10.20053 |
| Cu      | 0.005193  | 0.032944 | 10.06121 |
| Cu      | -3.611264 | 2.587819 | 10.03897 |
| Cu      | 0.008510  | 2.602557 | 10.17422 |



Table 24: Structure of the near- $c(2\times 2)$  1.0 ML H<sub>2</sub>O/NH<sub>3</sub> phase, calculated in a  $(2\times 2)$  cell (Data for Fig. 19, structure III).

| Element | x         | y         | z        |
|---------|-----------|-----------|----------|
| H       | -4.601544 | 2.824546  | 12.62695 |
| H       | -2.122059 | 0.625779  | 14.91404 |
| H       | 0.972250  | 3.250214  | 14.96626 |
| H       | 0.274705  | 1.243245  | 12.41072 |
| H       | -3.203282 | 3.694751  | 12.52536 |
| H       | -3.135489 | 2.059393  | 12.71997 |
| H       | -3.551477 | 0.484722  | 14.34349 |
| H       | 0.597514  | -0.360444 | 12.64327 |
| H       | -0.113661 | 3.024656  | 13.86637 |
| H       | -0.976505 | 0.161608  | 12.52128 |
| N       | -3.647325 | 2.814550  | 12.25834 |
| N       | -0.026252 | 0.296953  | 12.17267 |
| O       | -2.609374 | 0.487017  | 14.07668 |
| O       | 0.852675  | 3.026288  | 14.02242 |
| Cu      | -5.409000 | 1.274914  | 1.274914 |
| Cu      | -1.803000 | 1.274914  | 1.274914 |
| Cu      | -5.409000 | 3.824741  | 1.274914 |
| Cu      | -1.803000 | 3.824741  | 1.274914 |
| Cu      | -3.606000 | 2.549827  | 2.549827 |
| Cu      | 0.000000  | 2.549827  | 2.549827 |
| Cu      | -3.606000 | 0.000000  | 2.549827 |
| Cu      | 0.000000  | 0.000000  | 2.549827 |
| Cu      | -5.409000 | 3.824741  | 3.824741 |
| Cu      | -1.803000 | 3.824741  | 3.824741 |
| Cu      | -5.409000 | 1.274914  | 3.824741 |
| Cu      | -1.803000 | 1.274914  | 3.824741 |
| Cu      | -3.606000 | 2.549827  | 5.099654 |
| Cu      | 0.000000  | 2.549827  | 5.099654 |
| Cu      | -3.606000 | 0.000000  | 5.099654 |
| Cu      | 0.000000  | 0.000000  | 5.099654 |
| Cu      | -5.408423 | 1.291589  | 6.379668 |
| Cu      | -1.806173 | 1.292405  | 6.379056 |
| Cu      | -5.410010 | 3.828055  | 6.376812 |
| Cu      | -1.805019 | 3.826882  | 6.376607 |
| Cu      | -3.608885 | 0.018971  | 7.590529 |
| Cu      | -0.003390 | 0.019277  | 7.688035 |
| Cu      | -3.608957 | 2.578487  | 7.709658 |
| Cu      | -0.004039 | 2.575478  | 7.590938 |
| Cu      | -5.412678 | 3.865181  | 8.937042 |
| Cu      | -1.811150 | 3.857073  | 8.924191 |
| Cu      | -5.414481 | 1.313467  | 8.934186 |
| Cu      | -1.809058 | 1.318006  | 8.919908 |
| Cu      | -3.606577 | 0.039828  | 9.990630 |
| Cu      | -0.013703 | 0.037839  | 10.16932 |
| Cu      | -3.605711 | 2.595775  | 10.21889 |
| Cu      | -0.013486 | 2.618927  | 9.991038 |

Table 25: Structure of the  $(2 \times 1)$  1.0 ML  $\text{H}_2\text{O}/\text{NH}_3$  phase (Data for Fig. 20, structure I).

| Element | x         | y         | z        |
|---------|-----------|-----------|----------|
| H       | 1.049021  | -0.811355 | 12.38359 |
| H       | -0.686546 | 1.814712  | 13.11672 |
| H       | 1.141155  | 0.765050  | 12.48660 |
| H       | -1.437135 | 2.429373  | 14.44712 |
| H       | -0.841713 | 3.424367  | 13.28786 |
| N       | -1.324556 | 2.540036  | 13.44126 |
| O       | 0.515838  | 0.015503  | 12.36075 |
| Cu      | -1.803000 | 1.274914  | 1.274914 |
| Cu      | -1.803000 | 3.824741  | 1.274914 |
| Cu      | 0.000000  | 2.549827  | 2.549827 |
| Cu      | 0.000000  | 0.000000  | 2.549827 |
| Cu      | -1.803000 | 3.824741  | 3.824741 |
| Cu      | -1.803000 | 1.274914  | 3.824741 |
| Cu      | 0.000000  | 0.000000  | 5.099654 |
| Cu      | 0.000000  | 2.549827  | 5.099654 |
| Cu      | -1.805019 | 1.278585  | 6.386399 |
| Cu      | -1.805272 | 3.824588  | 6.385583 |
| Cu      | -0.000541 | 0.003366  | 7.663557 |
| Cu      | 0.002921  | 2.554723  | 7.604808 |
| Cu      | -1.809743 | 1.288887  | 8.954177 |
| Cu      | -1.809274 | 3.822293  | 8.955400 |
| Cu      | -0.012405 | 0.010709  | 10.15749 |
| Cu      | -0.011575 | 2.556814  | 10.06570 |

Table 26: Structure of the  $(2 \times 1)$  1.0 ML  $\text{H}_2\text{O}/\text{NH}_3$  phase (Data for Fig. 20, structure II).

| Element | x         | y         | z        |
|---------|-----------|-----------|----------|
| H       | 0.836556  | -0.405627 | 12.78341 |
| H       | 0.269729  | 1.160681  | 12.71548 |
| H       | 1.689375  | 0.766325  | 11.95502 |
| H       | -1.538680 | 2.796599  | 13.46778 |
| H       | -0.784990 | 3.111095  | 12.11943 |
| N       | 0.754664  | 0.423118  | 12.19388 |
| O       | -0.673709 | 3.066473  | 13.10754 |
| Cu      | -1.803000 | 1.274914  | 1.274914 |
| Cu      | -1.803000 | 3.824741  | 1.274914 |
| Cu      | 0.000000  | 2.549827  | 2.549827 |
| Cu      | 0.000000  | 0.000000  | 2.549827 |
| Cu      | -1.803000 | 3.824741  | 3.824741 |
| Cu      | -1.803000 | 1.274914  | 3.824741 |
| Cu      | 0.000000  | 0.000000  | 5.099654 |
| Cu      | 0.000000  | 2.549827  | 5.099654 |
| Cu      | -1.798024 | 1.271803  | 6.398230 |
| Cu      | -1.801089 | 3.831574  | 6.401290 |
| Cu      | 0.015109  | 0.006069  | 7.729036 |
| Cu      | 0.017056  | 2.560179  | 7.602565 |
| Cu      | -1.784321 | 1.308469  | 8.993955 |
| Cu      | -1.780967 | 3.873697  | 9.022716 |
| Cu      | 0.020374  | 0.032791  | 10.30783 |
| Cu      | 0.007609  | 2.612400  | 10.02918 |

Table 27: Structure of the  $(2 \times 1)$  1.0 ML  $\text{H}_2\text{O}/\text{NH}_3$  phase (Data for Fig. 20, structure III).

| Element | x         | y         | z        |
|---------|-----------|-----------|----------|
| H       | 1.082161  | -0.297973 | 12.94578 |
| H       | 0.181165  | 1.109889  | 12.85521 |
| H       | 1.478640  | 0.834405  | 11.82610 |
| H       | -1.671165 | 2.570532  | 12.82175 |
| H       | -0.484610 | 3.509072  | 13.06429 |
| N       | 0.683589  | 0.396294  | 12.31016 |
| O       | -0.962550 | 2.760800  | 13.46696 |
| Cu      | -1.803000 | 1.274914  | 1.274914 |
| Cu      | -1.803000 | 3.824741  | 1.274914 |
| Cu      | 0.000000  | 2.549827  | 2.549827 |
| Cu      | 0.000000  | 0.000000  | 2.549827 |
| Cu      | -1.803000 | 3.824741  | 3.824741 |
| Cu      | -1.803000 | 1.274914  | 3.824741 |
| Cu      | 0.000000  | 0.000000  | 5.099654 |
| Cu      | 0.000000  | 2.549827  | 5.099654 |
| Cu      | -1.796978 | 1.274710  | 6.409041 |
| Cu      | -1.800043 | 3.821936  | 6.410265 |
| Cu      | 0.004868  | 0.000153  | 7.739644 |
| Cu      | 0.014208  | 2.544116  | 7.634794 |
| Cu      | -1.793769 | 1.288071  | 9.026388 |
| Cu      | -1.794850 | 3.832288  | 9.031896 |
| Cu      | -0.020158 | -0.008414 | 10.31742 |
| Cu      | -0.003606 | 2.581700  | 10.09609 |
